# Supplementary material for: Revisiting the host adhesion determinants of Streptococcus thermophilus siphophages
Source: PubMed Central journal article supplement — Microb Biotechnol. 2020 Jun 11;13(6):1765–79. doi: 10.1111/1751-7915.13593 (PMC7533335; doi:10.1111/1751-7915.13593), 2020-06-11
Supplement: MBT2-13-1765-s001.pdf [file MBT2-13-1765-s001.pdf]

B

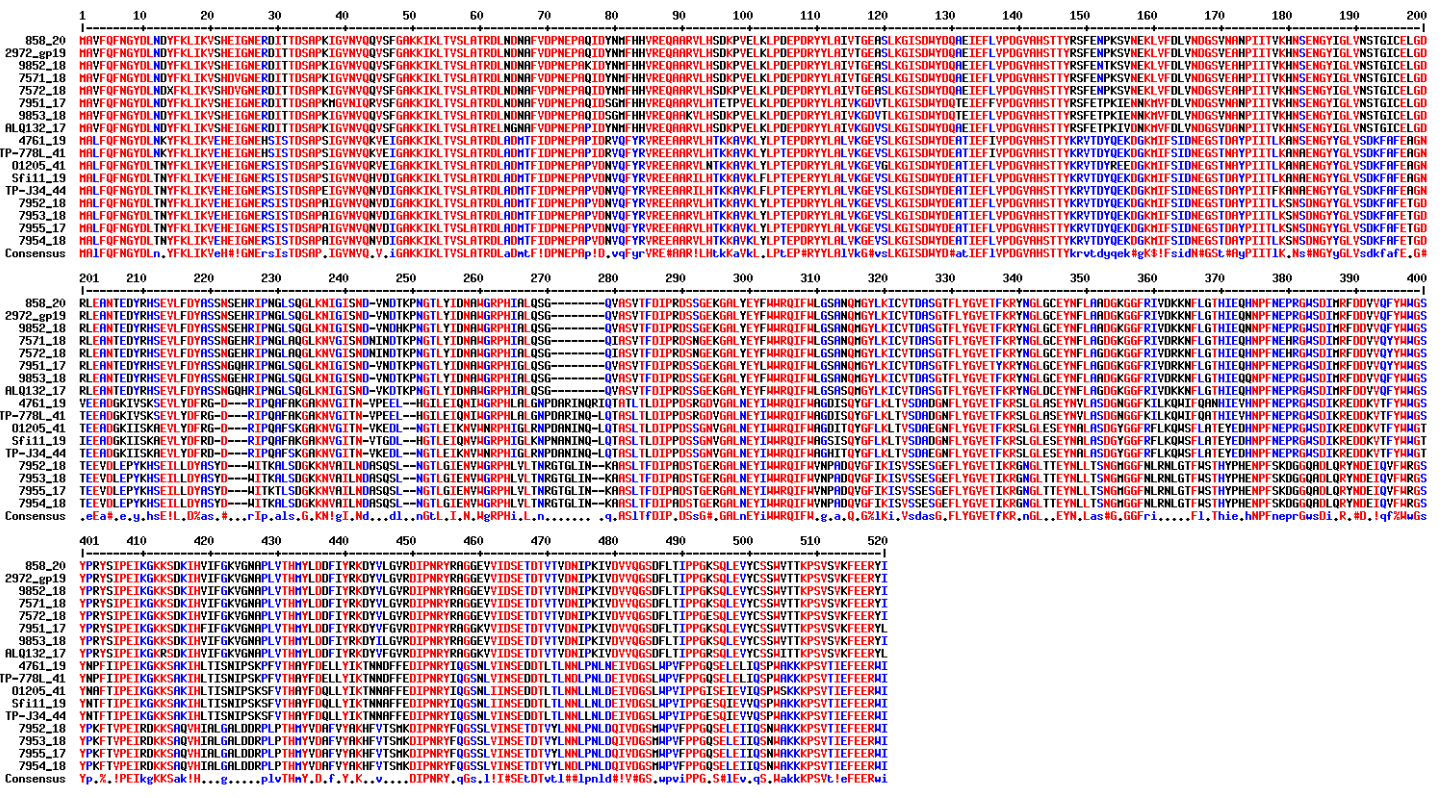

Figure S1. Sequence alignment of the cos (A) and pac (Brussowvirus) (B) Dit proteins. The conserved amino acids are in red and the partially conserved in blue. Otherwise in black.

C

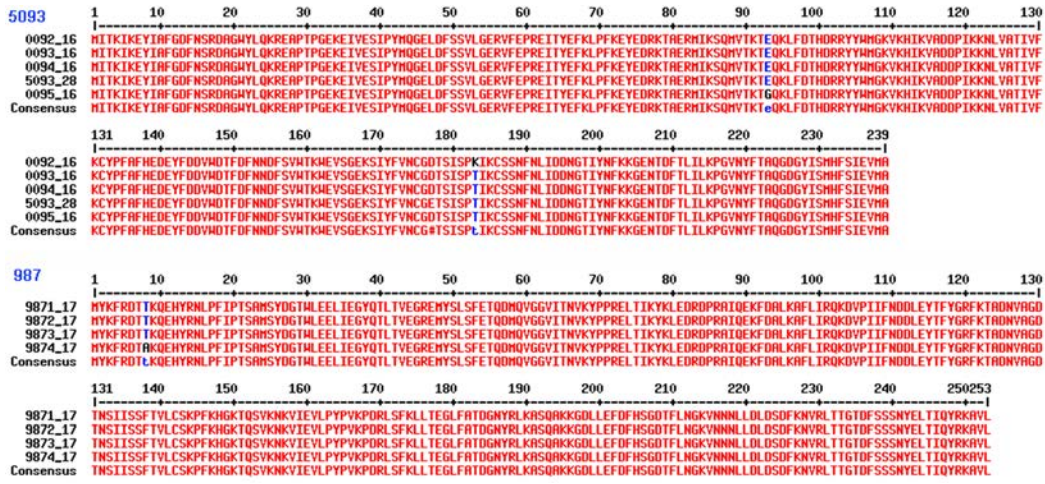

Figure S1. Sequence alignment of the cos (A), pac (Brussowvirus) (B), 5093 and 987 (C) Dit proteins. The conserved amino acids are in red and the partially conserved in blue. Otherwise in black.
