# Supplementary material for: Revisiting the host adhesion determinants of Streptococcus thermophilus siphophages
Source: PubMed Central journal article supplement — Microb Biotechnol. 2020 Jun 11;13(6):1765–79. doi: 10.1111/1751-7915.13593 (PMC7533335; doi:10.1111/1751-7915.13593), 2020-06-11
Supplement: MBT2-13-1765-s002.pdf [file MBT2-13-1765-s002.pdf]

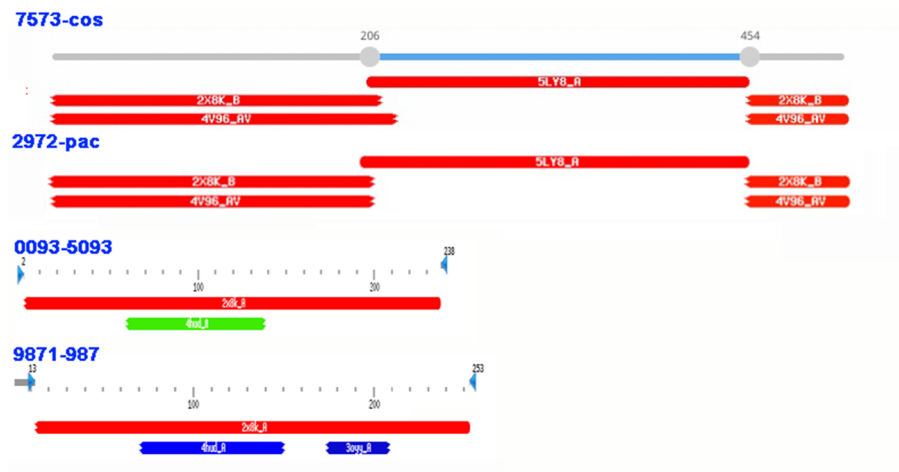

Figure S2. HHpred analysis of the DIT proteins from cos, pac, 5083 and 987 representative phages. The horizontal bars are proportional to the proteins lengths, and the labels within the bars correspond to the PDB identification of the structurally closest protein. The insertions observed in Dits found in cos and pac phages correspond to *Lactobacillus* phage J1 inserted CBM domain (25).
