# Supplementary material for: Revisiting the host adhesion determinants of Streptococcus thermophilus siphophages
Source: PubMed Central journal article supplement — Microb Biotechnol. 2020 Jun 11;13(6):1765–79. doi: 10.1111/1751-7915.13593 (PMC7533335; doi:10.1111/1751-7915.13593), 2020-06-11
Supplement: MBT2-13-1765-s003.pdf [file MBT2-13-1765-s003.pdf]

A

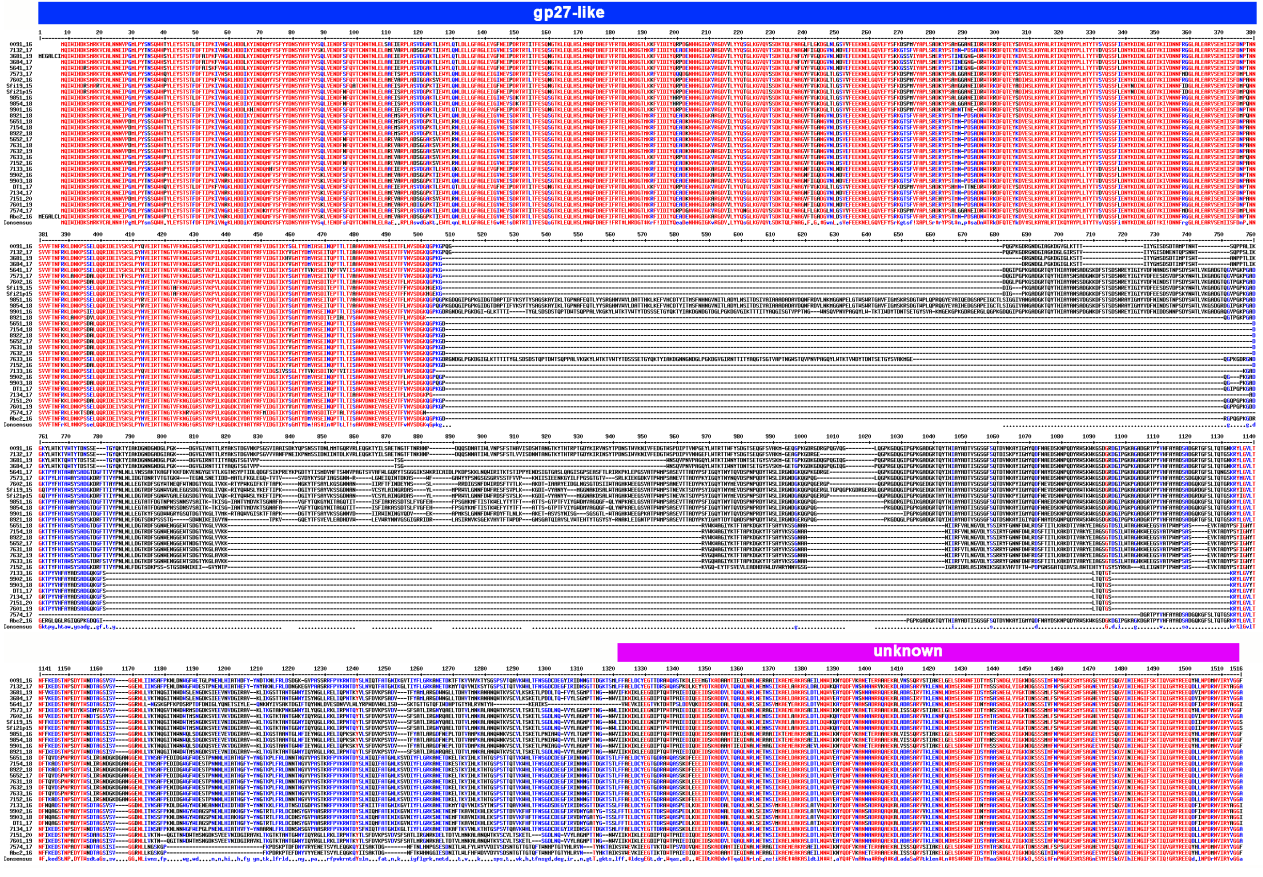

B

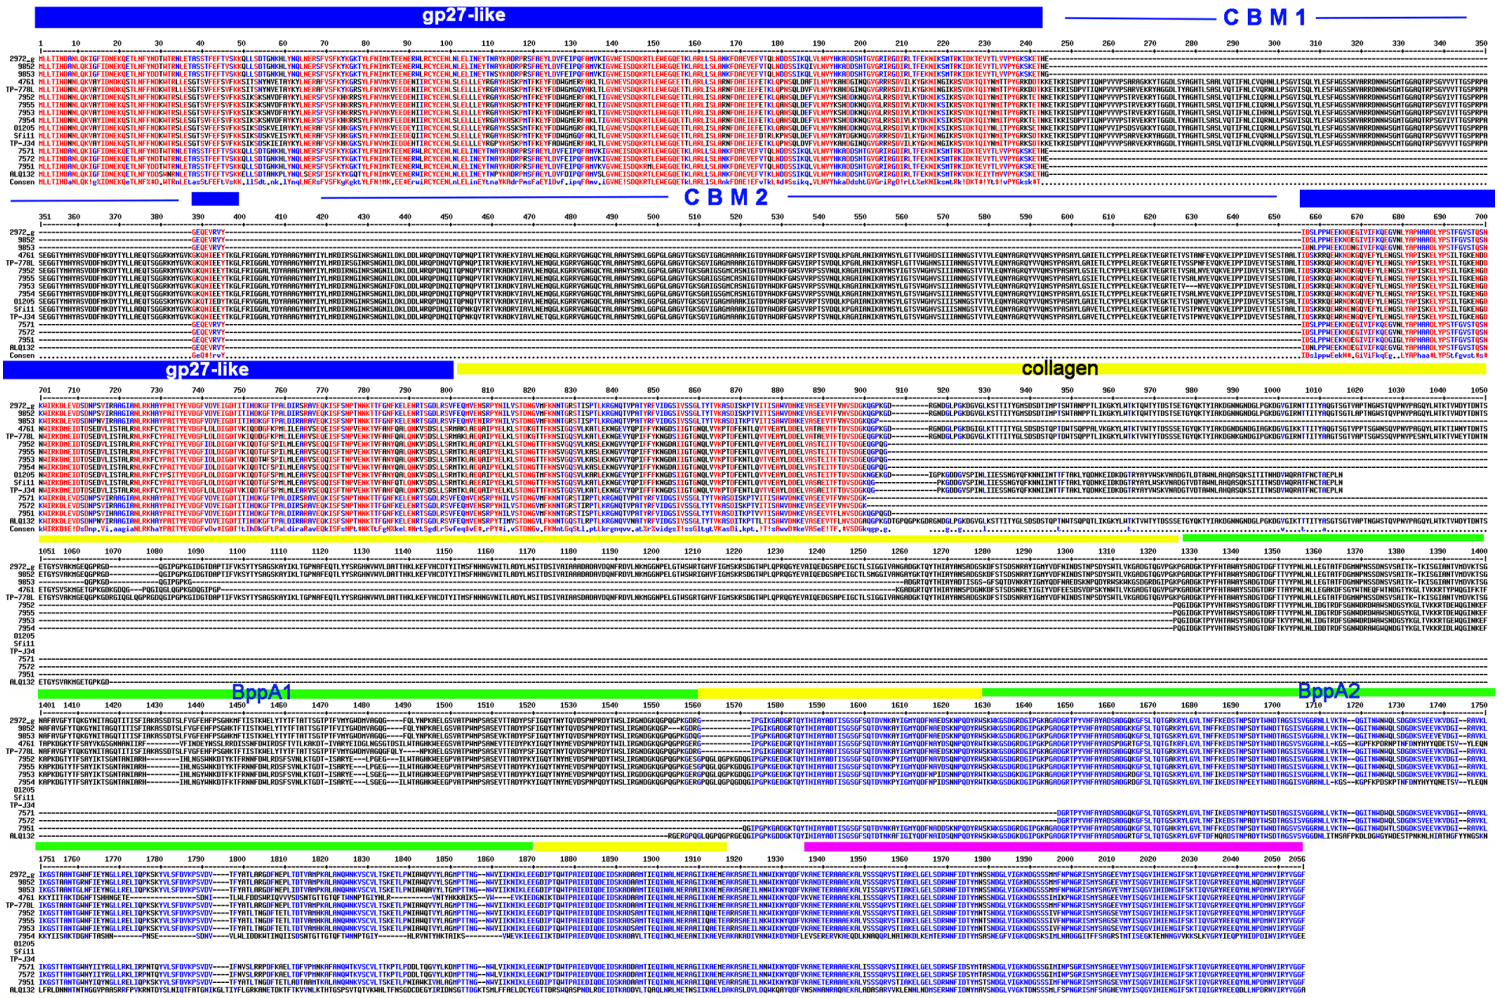

Figure S3. A) Sequence alignment of the cos Tal proteins. The conserved amino acids are in red and the partially conserved in blue. Otherwise in black. To note, the excellent conservation of the N-terminal gp27-like domain, as well as that of the C-terminus of unknown fold.

B) Sequence alignment of the pac (Brussowvirus) Tal proteins. The conserved amino acids are in red and the partially conserved in blue. Otherwise in black. To note, the excellent conservation of the N-terminal gp27-like domain, as well as that of the BppA2 and of the C-terminus of unknown fold.
