# Supplementary material for: Revisiting the host adhesion determinants of Streptococcus thermophilus siphophages
Source: PubMed Central journal article supplement — Microb Biotechnol. 2020 Jun 11;13(6):1765–79. doi: 10.1111/1751-7915.13593 (PMC7533335; doi:10.1111/1751-7915.13593), 2020-06-11
Supplement: MBT2-13-1765-s004.pdf [file MBT2-13-1765-s004.pdf]

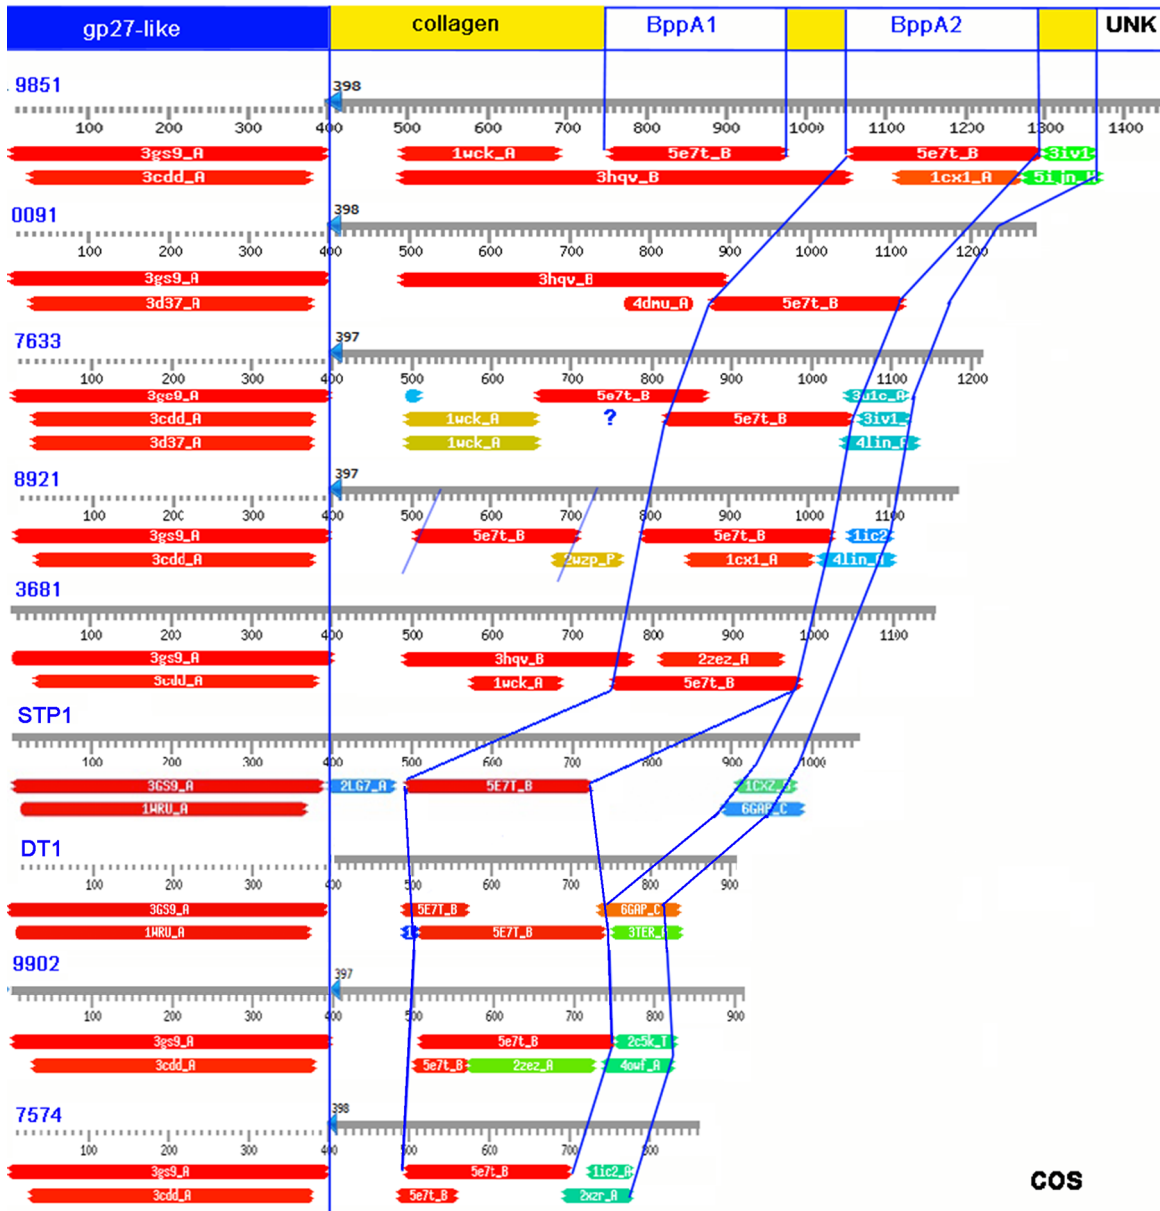

**COS**

Figure S4. A) HHpred analysis of the Tal proteins from *cos* representative phages. The horizontal bars are proportional to the protein lengths, and the labels within the bars correspond to the PDB identification of the structurally closest protein. The gp27-like domain correspond to the conserved N-terminal structural domain of Tal. The 1 or 2 insertions in the Tal extensions correspond to the inserted CBM domain of the Tuc2009 BppA protein (28).

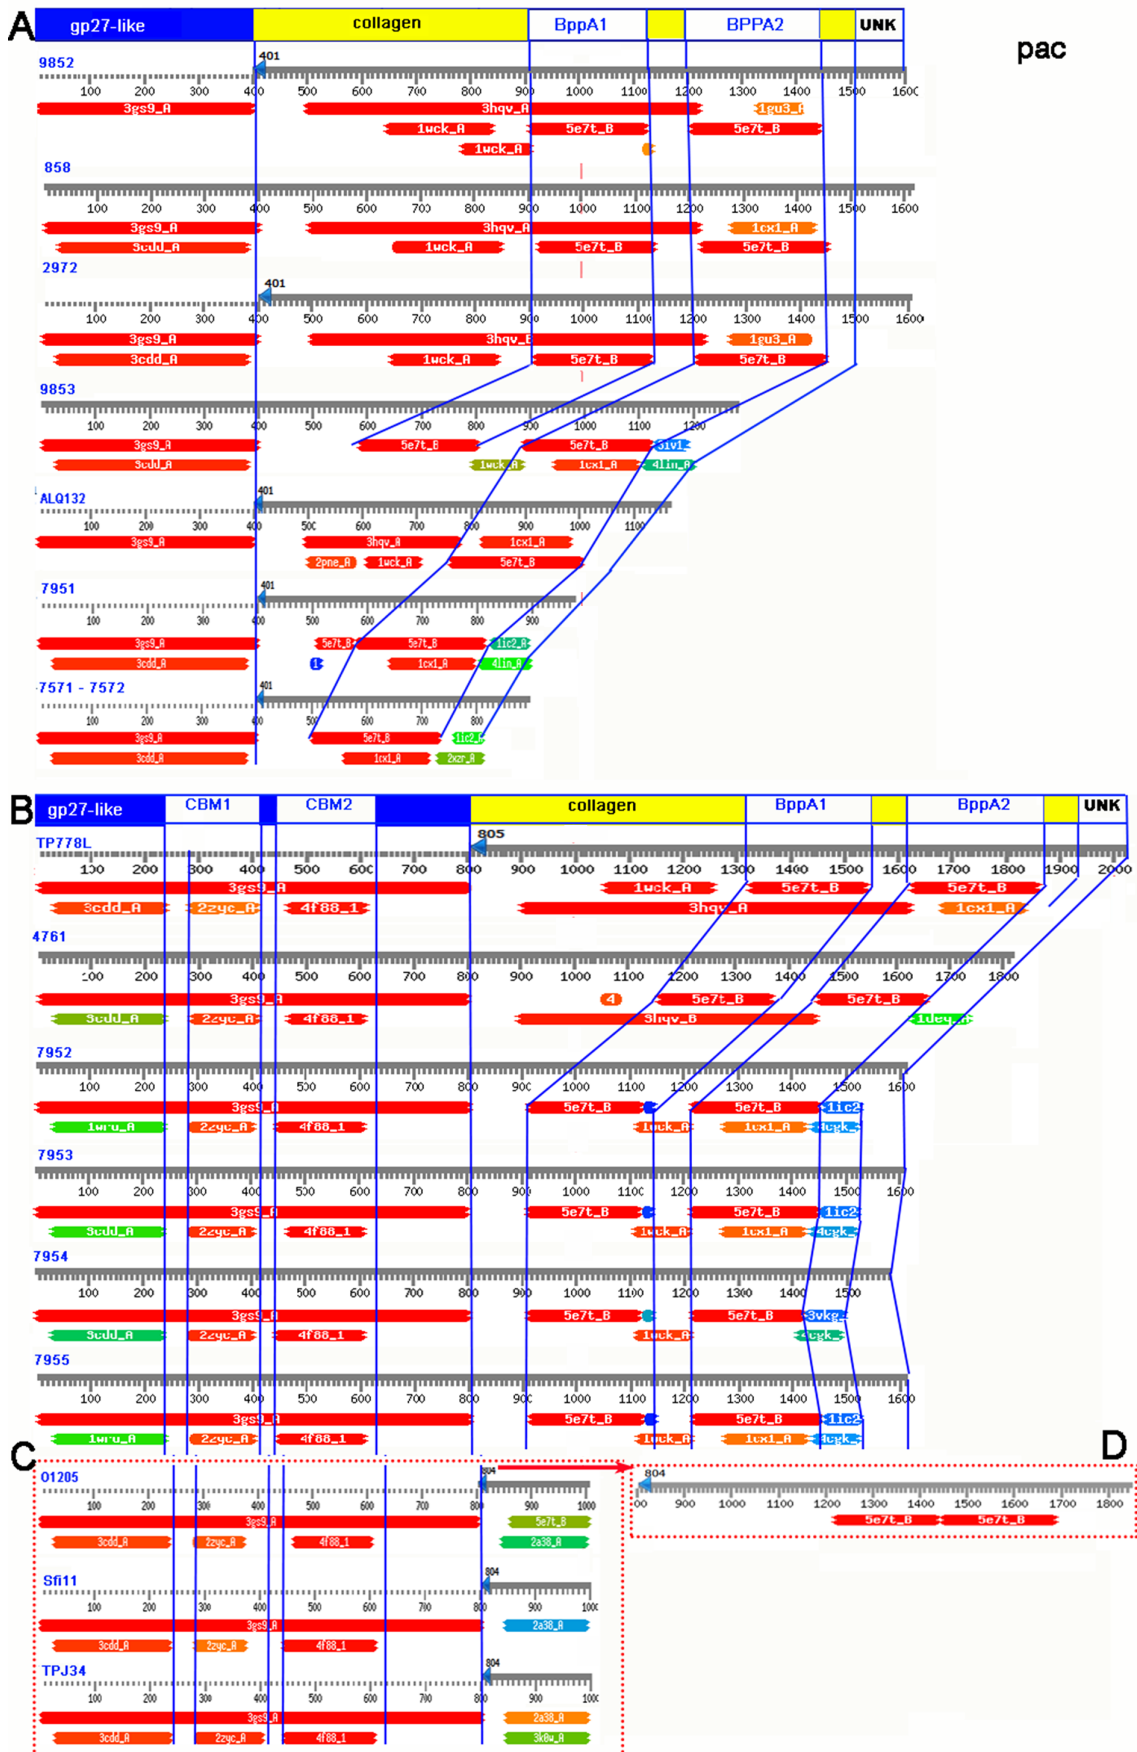

Figure S4. B). HHpred analysis of the Tal proteins from pac (Brussowvirus) representative phages. A- The pac A sub-group does not exhibit extensions in the conserved N-terminal structural domain. B- The pac B sub-group exhibits two extensions in the conserved N-terminal structural domain. C- The pac outliers. The horizontal bars are proportional to the proteins lengths, and the labels within the bars correspond to the PDB identification of the structurally closest protein. The gp27-like domain correspond to the conserved N-terminal structural domain of Tal. The 1 or 2 insertions in the Tal extensions correspond to the inserted CBM domain of the Tuc2009 BppA protein (28).
