# Supplementary material for: Revisiting the host adhesion determinants of Streptococcus thermophilus siphophages
Source: PubMed Central journal article supplement — Microb Biotechnol. 2020 Jun 11;13(6):1765–79. doi: 10.1111/1751-7915.13593 (PMC7533335; doi:10.1111/1751-7915.13593), 2020-06-11
Supplement: MBT2-13-1765-s007.pdf [file MBT2-13-1765-s007.pdf]

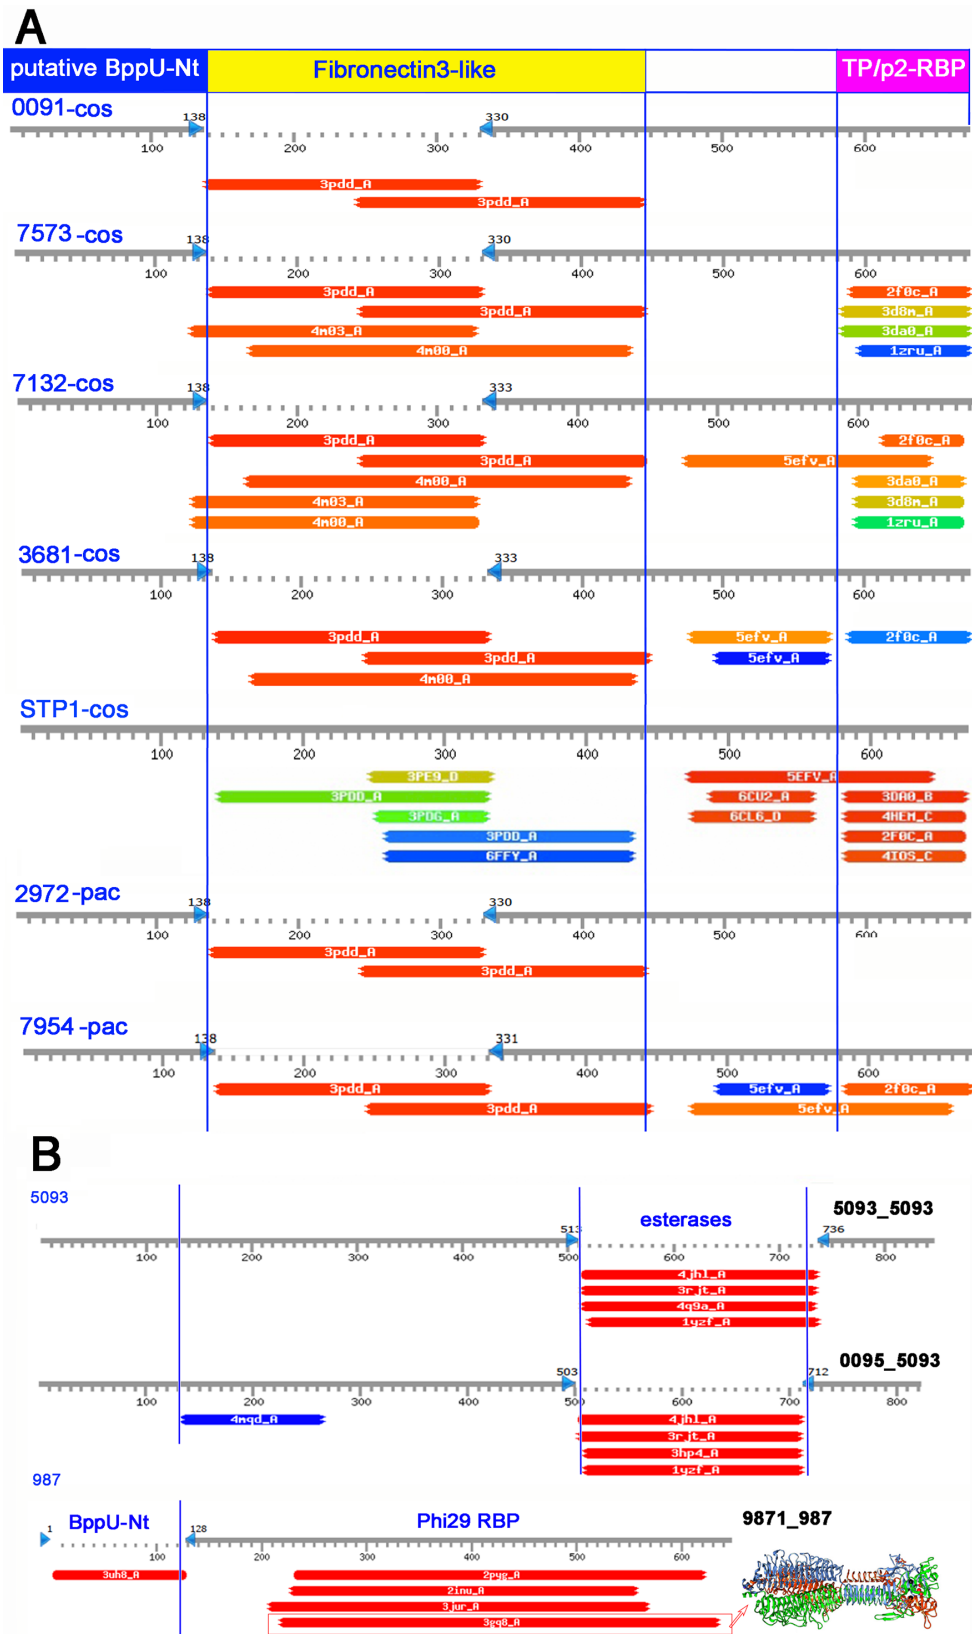

Figure S07. HHpred analysis of the proteins following Tal (putative RBPs) from cos, pac, 5083 and 987 representative phages. A- phages cos and pac putative RBPs. The N-terminus (blue, residues 1~140) was putatively assigned to a BppU-like N-terminal domain. The last ~140 residues share the fold of p2/TP901-1 phages RBPs. B- phages 5083 and 987 putative RBPs. The N-terminus (blue, residues 1~140) was putatively assigned to a BppU-like Nterminal domain. The horizontal bars are proportional to the proteins lengths, and the labels within the bars correspond to the PDB identification of the structurally closest protein.
