# Supplementary material for: Revisiting the host adhesion determinants of Streptococcus thermophilus siphophages
Source: PubMed Central journal article supplement — Microb Biotechnol. 2020 Jun 11;13(6):1765–79. doi: 10.1111/1751-7915.13593 (PMC7533335; doi:10.1111/1751-7915.13593), 2020-06-11
Supplement: MBT2-13-1765-s009.pdf [file MBT2-13-1765-s009.pdf]

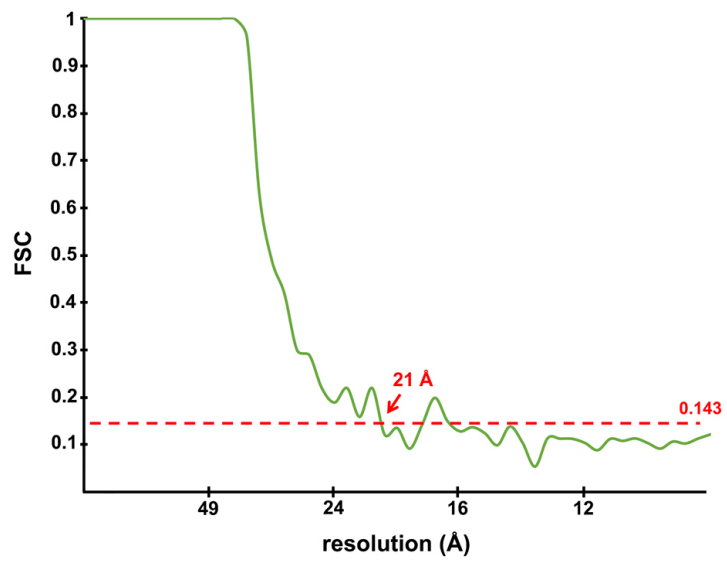

Figure S09. Fourier shell correlation (FSC) curves of the final three-dimensional reconstruction. This curve was obtained by correlation of two different three-dimensional images created by splitting the particle set into two subsets. The resolution was at 21 Å for the tail tip.
