# Supplementary material for: Revisiting the host adhesion determinants of Streptococcus thermophilus siphophages
Source: PubMed Central journal article supplement — Microb Biotechnol. 2020 Jun 11;13(6):1765–79. doi: 10.1111/1751-7915.13593 (PMC7533335; doi:10.1111/1751-7915.13593), 2020-06-11
Supplement: MBT2-13-1765-s010.pdf [file MBT2-13-1765-s010.pdf]

801

802 **Table S1:** Primers used in this study. TEV cleavage sites are represented in bold while  
803 incorporated stop codons are underlined

| Primer                       | Sequence                                                             |
|------------------------------|----------------------------------------------------------------------|
| <b>ORF15 CBM <i>forw</i></b> | tcagcaagggctgagg <b>gaaaacctgtatttcagggc</b> aagactacatatttcacacagc  |
| <b>ORF15 CBM <i>rev</i></b>  | tcagcggaagctgagg <u>tta</u> aaaaccccatccgtcaatatt                    |
| <b>ORF16 CBM <i>forw</i></b> | tcagcaagggctgagg <b>gaaaacctgtatttcagggc</b> agtaataacggcgtcccaaatgg |
| <b>ORF16 CBM <i>rev</i></b>  | tcagcggaagctgagg <u>tta</u> attgctgggtattcgtcttc                     |

804
