# Supplementary figures and images for: Revisiting the host adhesion determinants of Streptococcus thermophilus siphophages
Source: PubMed Central journal article supplement — Microb Biotechnol. 2020 Jun 11;13(6):1765–79. doi: 10.1111/1751-7915.13593 (PMC7533335; doi:10.1111/1751-7915.13593), 2020-06-11

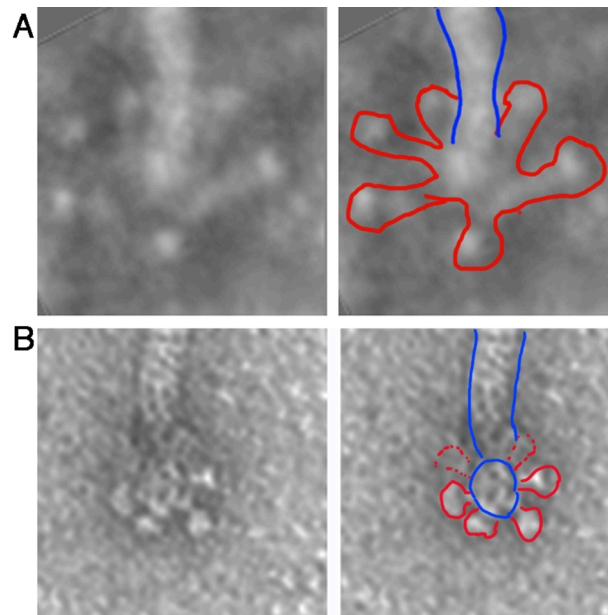

Figure S08. Electron microscopy views of phage 5093 (40) and 987 (33) .

Supplement: MBT2-13-1765-s008.pdf [file MBT2-13-1765-s008.pdf]
